# Supplementary material for: Heat Shock Protein 70 Improves In Vitro Embryo Yield and Quality from Heat Stressed Bovine Oocytes
Source: MDPI journal article supplement (doi:10.3390/ani11061794), 2021-06-16
Supplement: s1 [file s1]

**Table S1.** Distribution of blastocysts according to their developmental stage in four groups of COCs matured *in vitro* at 39° C without (group C39) or with HSP70 (group H39), at 41°C for 6 hours from the 2nd to 8th hour of IVM without (group C41) or with HSP70 (group H41).

| Embryostage | Day 7 blastocysts |     |     |    | Day 8 blastocysts |     |     |    | Day 9 blastocysts |     |     |    |
|-------------|-------------------|-----|-----|----|-------------------|-----|-----|----|-------------------|-----|-----|----|
|             | EaB               | B   | ExB | HB | EaB               | B   | ExB | HB | EaB               | B   | ExB | HB |
| <b>C39</b>  | 48                | 106 | 0   | 0  | 7                 | 147 | 12  | 6  | 0                 | 70  | 87  | 22 |
| <b>H39</b>  | 32                | 62  | 0   | 0  | 17                | 82  | 10  | 2  | 1                 | 45  | 61  | 15 |
| <b>C41</b>  | 39                | 63  | 0   | 0  | 10                | 108 | 5   | 0  | 3                 | 87  | 27  | 12 |
| <b>H41</b>  | 60                | 126 | 0   | 0  | 12                | 189 | 17  | 8  | 3                 | 111 | 96  | 25 |

*EaB: Early blastocyst; B: blastocyst; ExB Expanded blastocyst; HB: hatched blastocyst*

**Table S2.** Significant differences in gene expression between C and H groups in oocytes.

| Gene name       | C group | H group |
|-----------------|---------|---------|
| <i>HSP90AA1</i> | C41     | H41     |
| <i>HSP90AA1</i> | C41     | H39     |
| <i>HSPB11</i>   | C39     | H39     |
| <i>HSPB11</i>   | C39     | H41     |
| <i>HSPB11</i>   | C41     | H41     |
| <i>HSPB11</i>   | C41     | H39     |
| <i>SOD2</i>     | C39     | H39     |
| <i>SOD2</i>     | C39     | H41     |
| <i>GPX1</i>     | C39     | H39     |
| <i>GPX1</i>     | C39     | H41     |
| <i>GPX1</i>     | C41     | H41     |
| <i>GPX1</i>     | C41     | H39     |
| <i>G6PD</i>     | C39     | H39     |
| <i>G6PD</i>     | C41     | H39     |
| <i>BCL2</i>     | C39     | H39     |
| <i>BCL2</i>     | C39     | H41     |
| <i>BCL2</i>     | C41     | H41     |
| <i>BCL2</i>     | C41     | H39     |

**Table S3.** Significant differences in gene expression between C and H groups in cumulus cells.

| Gene name       | C group | H group |
|-----------------|---------|---------|
| <i>HSPA1A</i>   | C39     | H39     |
| <i>HSPA1A</i>   | C39     | H41     |
| <i>HSPA1A</i>   | C41     | H41     |
| <i>HSP90AA1</i> | C39     | H41     |
| <i>GSTP1</i>    | C41     | H39     |
| <i>GSTP1</i>    | C41     | H41     |
| <i>HSF1</i>     | C39     | H41     |
| <i>IGF1</i>     | C39     | H39     |
| <i>IGF1</i>     | C41     | H39     |
| <i>BCL2</i>     | C39     | H41     |
| <i>BCL2</i>     | C41     | H41     |

**Table S4:** Significant differences in gene expression between C and H groups in blastocysts

| <b>Gene name</b> | <b>C group</b> | <b>H group</b> |
|------------------|----------------|----------------|
| <i>HSPA1A</i>    | C39            | H41            |
|                  | C41            | H41            |
| <i>AKR1B1</i>    | C39            | H39            |
| <i>AKR1B1</i>    | C39            | H41            |
| <i>AKR1B1</i>    | C41            | H39            |
| <i>AKR1B1</i>    | C41            | H41            |
| <i>GSTP1</i>     | C39            | H39            |
| <i>GSTP1</i>     | C41            | H41            |
| <i>GSTP1</i>     | C41            | H39            |
| <i>IGF1</i>      | C39            | H39            |
| <i>IGF1</i>      | C39            | H41            |
| <i>IGF1</i>      | C41            | H39            |
| <i>IGF1</i>      | C41            | H41            |
| <i>ATP1A1</i>    | C39            | H41            |
| <i>ATP1A1</i>    | C41            | H41            |
